# Supplementary material for: Infrared pupillometry to help predict neurological outcome for patients achieving return of spontaneous circulation following cardiac arrest: a systematic review protocol
Source: Springer Nature journal article supplement (doi:10.1186/s13643-019-1209-z), 2019-11-25
Supplement: MOESM2 [file 17430960]

Infrared pupillometry to help predict neurological outcome for patients achieving return of spontaneous circulation (ROSC) following cardiac arrest: systematic review

*Alex Monk, Shashank Patill, Lisa Ramage, Leanne Eveson*

### Citation

Alex Monk, Shashank Patill, Lisa Ramage, Leanne Eveson. Infrared pupillometry to help predict neurological outcome for patients achieving return of spontaneous circulation (ROSC) following cardiac arrest: systematic review. PROSPERO 2018 CRD42018118180 Available from: [http://www.crd.york.ac.uk/PROSPERO/display\\_record.php?ID=CRD42018118180](http://www.crd.york.ac.uk/PROSPERO/display_record.php?ID=CRD42018118180)

### Review question

Can infrared pupillometry help predict neurological outcome in patients who achieve return of spontaneous circulation (ROSC) following cardiac arrest.

### Searches

We will search the following electronic bibliographic databases: MEDLINE, EMBASE, CINAHL and The Cochrane Library (Cochrane Database of Systematic Reviews, Cochrane Central Register of Controlled Trials (CENTRAL), Cochrane Methodology Register).

### Types of study to be included

Retrospective studies, Prospective cohort studies, Randomised controlled trials, Systematic reviews.

### Condition or domain being studied

Neurological outcome in patients achieving return of spontaneous circulation following cardiac arrest.

### Participants/population

Adults over 18 years of age.

### Intervention(s), exposure(s)

Inclusion criteria:

Cardiac arrest in adults over 18 years of age

Use of infrared pupillometry performed within 24 hours of ROSC

Neurological outcome

Exclusion criteria:

Case reports

Paediatric studies

Studies including pregnant women

Non English studies

Cardiac arrest of non cardiac aetiology.

### Comparator(s)/control

Patients who had no such intervention or use of the current prognostication guidance will form the control group.

### Context

## PROSPERO

### International prospective register of systematic reviews

#### Main outcome(s)

Ability to predict neurological outcome using infrared pupillometry as a quantitative tool.

#### Timing and effect measures

Within 24 hours of presentation to hospital: Emergency department or ITU

The impact of targeted temperature management on ICU stays.

#### Additional outcome(s)

Prediction of survival.

Prediction of ROSC.

#### Data extraction (selection and coding)

- A search strategist will run searches on above mentioned databases using key words.

- 2 reviewers will independently review the abstracts, include all the papers agreed on.

- If different views on certain papers, an opinion will be sought from a third reviewer

Data to be extracted:

- Outcome of cardiac arrest
- Neurological outcome
- Survival at discharge
- Number of days on ITU
- Quantitative value of infrared pupillometry.

#### Risk of bias (quality) assessment

For RCT we will use the Cochrane ROB tool.

For non RCTs - ROBINS-I tool.

#### Strategy for data synthesis

We will use Grades of Recommendation, Assessment, Development and Evaluation (GRADE) system for analysis of selected studies.

Results will be stored in HDAS (Healthcare Database Advanced Search)

We will use Cochrane template for data extraction.

#### Analysis of subgroups or subsets

None at this point, will be reviewed if need be.

#### Contact details for further information

Dr Shashank Patil

shashank.patil@chelwest.nhs.uk

#### Organisational affiliation of the review

Chelsea and Westminster NHS Foundation Trust

<http://www.chelwest.nhs.uk/>

#### Review team members and their organisational affiliations

Dr Alex Monk. Chelsea and Westminster NHS Foundation Trust

**PROSPERO**  
International prospective register of systematic reviews

Dr Shashank Patill. Chelsea and Westminster NHS Foundation Trust  
 Dr Lisa Ramage. Chelsea and Westminster NHS Foundation Trust  
 Dr Leanne Eveson. Chelsea and Westminster NHS Foundation Trust

**Anticipated or actual start date**

01 January 2019

**Anticipated completion date**

30 June 2019

**Funding sources/sponsors**

None.

**Conflicts of interest****Language**

English

**Country**

England

**Stage of review**

Review\_Ongoing

**Subject index terms status**

Subject indexing assigned by CRD

**Subject index terms**

Cardiopulmonary Resuscitation; Heart Arrest; Humans

**Date of registration in PROSPERO**

13 December 2018

**Date of publication of this version**

13 December 2018

**Details of any existing review of the same topic by the same authors****Stage of review at time of this submission**

| <b>Stage</b>                                                    | <b>Started</b> | <b>Completed</b> |
|-----------------------------------------------------------------|----------------|------------------|
| Preliminary searches                                            | Yes            | Yes              |
| Piloting of the study selection process                         | No             | No               |
| Formal screening of search results against eligibility criteria | No             | No               |
| Data extraction                                                 | No             | No               |
| Risk of bias (quality) assessment                               | No             | No               |
| Data analysis                                                   | No             | No               |

**Versions**

13 December 2018

**PROSPERO**

This information has been provided by the named contact for this review. CRD has accepted this information in good

faith and registered the review in PROSPERO. CRD bears no responsibility or liability for the content of this registration record, any associated files or external websites.
